# Supplementary material
Source: publisher figshare collection journal article supplement (https://geolsoc.figshare.com/ndownloader/files/5424203)
Supplement: Supplementary file 1 [file 5424203]

Supplementary data to Button and Cawthorn "Distribution of mafic Sills in the Transvaal Supergroup, Northeastern South Africa
	Column 1 refers to a farm or town name where the traverse was taken
	Columns 2 and 3 refer to the grid used in the figures. Each grid square is 100 units in these columns
		Thus X = 385 refers to block number 4 on the x axis, 0.85 of the way from left edge
		Y are numeric here, and alphabetic in figures. Thus Y=381 is 4th block from bottom (B), 0.81 of way up from base.
	Column 4 is depth in m below base of the Bushveld Complex
	Columns 5 and 6 refer to the formation as listed in Table 1
	Column 7 refers to the thickness measured for that formation
	Column 8 is number of sills intersected in that formation
	Columns 9 to end are the thicknesses of each individual sill listed from the base upward
1	2	3	4	5	6	7	8	9	10	11	12	13	14	15	16	17	18	19	20	21	22	23	24	25	26	27	28	29	30	31	32	33	34	35	36	37	38	39	40	41	42	43
Section	X	Y	Depth	Unit	Unit	Thickness	No of	Thickness
Name			to BC	Name	Number		Sills	1	2	3	4	5	6	7	8	9	10	11	12	13	14	15	16	17	18	19	20	21	22	23	24	25	26	27	28	29	30	31	32	33	34	35
PAL01	385	381	360	P	18	994	2	2	2
PAL06	380	315	360	P	18	114	1	2
PAL11	397	390	360	P	18	416	1	182
PAL15	380	342	360	P	18	403	1	9
DRT01	385	310	360	P	18	849	2	19	12
DRT04	375	215	335	P	18	586	1	51
DRI02	375	268	335	P	18	776
DRI05	375	230	335	P	18	377
PAL01	400	376	820	P	17	820	5	348	14	24	71	42
PAL06	390	320	820	P	17	388	2	44	29
PAL10	430	431		P	17	275	4	25	27	24	5
PAL11	415	390	820	P	17	894	8	80	213	131	14	34	31	56
DRT01	395	310	820	P	17	238	1	5
DRT02	390	268	770	P	17	337	1	20
DRI05	390	227	770	P	17	158	1	9
DRI06	390	250	770	P	17	155	1	17
LYD14	492	600	695	P	17	928	7	22	43	18	54	49	18	70
PAL02	420	363	1220	P	16	1000	3	156	68	42
PAL10	440	420	175	P	16	595	1	20
PAL13	480	510		P	16	404	2	26	170
PAL14	455	458	175	P	16	261	1	29
DRI13	405	286	1140	P	16	902	1	80
DRI06	395	249	1140	P	16	468
LYD05	482	530		P	16	114
LYD14	485	595		P	16	68
PAL03	450	368	1900	P	15	1673	7	83	3	133	342	230	26	49
PAL09	470	418	615	P	15	549	12	767	14	20	2	3	9	3	17	19	3	39
PAL13	495	513	135	P	15	558	2	5	26
PAL14	475	450	615	P	15	855	5	279	5	71	36	2
DRI13	415	283	1790	P	15	479	3	7	49	5
LYD05	485	530	135	P	15	539	2	61	5
LYD13	475	543	135	P	15	494	4	71	1	14	90
LYD14	485	595	135	P	15	230	1	29
PAL03	470	360	2470	P	14	678	4	197	19	36	19
PAL09	484	418	990	P	14	493	2	27	153
PAL14	490	451	990	P	14	503	5	9	1	1	141	61
DRI16	451	332	2470	P	14	896	7	10	27	31	1	136	168	95
LYD04	490	565	360	P	14	219	1	61
LYD05	492	530	360	P	14	243	1	78
LYD13	490	547	360	P	14	471	1	39
PEN10	471	746		P	14	167
PEN17	470	732		P	14	130
PAL05	500	381	3010	P	13	1569	14	2	83	27	17	248	46	27	24	7	3	12	83	126	210
PAL08	500	453	1425	P	13	1146	12	5	17	2	2	94	2	49	39	12	107	34	133
PAL12	480	350	3010	P	13	1466	14	44	95	187	26	20	3	48	12	2	4	22	14	128	136
PAL13	512	509	695	P	13	813	7	24	34	17	48	73	3	5	20
DRI07	450	230	2925	P	13	564	10	1	5	22	63	37	2	95	12	51
DRI07	450	230	2925	P	13	1544	15	2	2	60	7	53	3	37	209	1	1	1	78	32	1	43
DRI12	460	297	3010	P	13	672	8	9	9	60	2	7	2	200	17
DRI16	466	325	3010	P	13	1008	18	1	19	14	2	7	3	58	41	1	18	37	1	1	2	1	5	2	102
LYDO2	510	527	695	P	13	629	9	15	5	19	49	66	7	4	25	3
LYD04	500	564	695	P	13	670	6	14	15	31	3	36	20
PEN10	480	746		P	13	567	3	20	9	6
PEN17	480	730		P	13	700	7	10	23	126	29	2	4	25
BON05	415	123	3550	P	12	522	2	17	5
BON03	445	174	3550	P	12	612	2	61	51
PAL04	505	373	3625	P	12	447	1	14
PAL07	520	428	2000	P	12	522	1	17
DRI08	473	272	3625	P	12	440	2	27	41
DRI10	480	293	3625	P	12	631	1	66
LYD01	530	468	2000	P	12	432	5	5	1	19	29	14	22
LYD03	518	552	1200	P	12	671	5	12	10	41	14	56
LYD06	545	594	1200	P	12	730	4	95	48	17	20
BON06	445	120	4450	P	11	568	8	72	12	177	7	65	14	22	5
BON03	475	162	4450	P	11	1932	19	10	1	1	61	19	22	30	7	20	27	32	12	12	5	17	17	5	46	25
DRI09	490	267	4540	P	11	1759	35	21	3	10	7	10	1	2	7	1	1	3	5	3	1	5	5	5	1	54	54	5	5	2	2	3	1	2	27	17	36	15	137	27	9	9
DRI11	527	302	4540	P	11	2112	28	2	9	2	22	29	58	20	60	21	3	34	1	1	5	1	60	9	33	46	1	1	5	9	1	1	5	5	10
DRI15	490	215	4450	P	11	240	18	1	1	1	5	3	111	1	1	4	24	2	26	22	10	1	34	51
LYDO6	555	594	2250	P	11	1763	4	20	12	9	10
LYD07	550	426	2950	P	11	713	17	9	3	5	5	9	27	43	29	48	37	34	3	3	27	2	14
LYD15	560	538	2250	P	11	1771	9	10	10	17	3	17	20	5	10	7
PEN16	525	740	595	P	11	438	7	9	5	5	45	9	18	11
ECH05	560	665	680	P	11	129
KLO04	436	855	1265	P	10	299	2	7	54
BON02	482	122	5300	P	10	528	3	27	43	59
BON08	460	100	5300	P	10	397	3	10	5	3
BON01	485	125	5300	P	10	546	3	63	37	112
BON03	500	162	5300	P	10	490	5	10	37	32	5	32
KIN14	527	270	5390	P	10	371	1	80
BIR01	520	232	5300	P	10	400	4	16	5	37	10
RIE12	560	337	5390	P	10	497	5	9	24	41	53	26
LYD07	574	430	3900	P	10	647	6	14	3	2	8	29	37
LYD08	570	468	3900	P	10	556	1	27
LYD12	608	611	3265	P	10	452	3	37	20	39
ECH05	585	665	1510	P	10	333	1	19
LYD11	600	587	3265	P	10	547	2	43	29
PEN04	502	793	1775	P	10	255	2	36	14
KLO04	440	860	1430	P	9	428	1	45
BON02	489	115	5600	P	9	325	2	29	104
BON08	465	92	5600	P	9	241	1	75
BON03	515	155	5600	P	9	437	2	85	77
KIN06	567	285	5700	P	9	241	1	26
KIN14	532	266	5700	P	9	314	2	20	43
RIE04	585	325	5700	P	9	272	1	37
RIE03	585	360	5700	P	9	354	1	83
RIE11	587	402	4275	P	9	384	2	80	77
LYD12	615	606	3640	P	9	478	1	51	43
ECH01	610	644	1795	P	9	391	2	43	48
PEN03	485	822	2030	P	9	381	2	45	56
PEN04	505	795	2030	P	9	376	2	54	22
PEN14	518	766	2030	P	9	399	3	29	29	50
PEN15	565	708	1795	P	9	533	5	139	52	27	5	54
KIN09	535	249	5700	P	9	277
KLO04	440	860	1535	P	8	104	1	94
BON07	532	155	5738	P	8	224	2	46	90
BON08	467	90	5738	P	8	163	2	61	30
BON03	620	150	5738	P	8	160	2	50	58
KIN01	555	270	5845	P	8	275	3	79	27	105
KIN06	567	285	5845	P	8	304	3	94	17	85
KIN08	533	245	5845	P	8	264	2	100	68
KIN15	595	233	5845	P	8	277	2	107	70
KIN21	542	254	5845	P	8	252	2	80	70
RIE02	617	360	5845	P	8	197	2	88	56
RIE03	590	363	5845	P	8	194	2	88	56
RIE04	585	325	5845	P	8	189	2	90	48
RIE04	600	335	5845	P	8	267	2	90	126
RIE11	592	398	4418	P	8	218	2	85	39
RIE16	613	426	4418	P	8	200	2	102	41
SAB04	625	502	380	P	8	82	1	66
SAB04	625	508	380	P	8	78	1	46
PEN14	518	766	2165	P	8	122	1	108
PEN15	595	710	1935	P	8	236	1	209
LYD09	653	562	3800	P	8	12
LYD12	625	605	3800	P	8	20
ECH01	620	647	1935	P	8	15
PEN04	514	795	2185	P	8	7
MAK12	13	855		P	8	243
MAK14	15	900		P	8	92
PEN03	490	825	2185	P	8	12
KAL06	552	173	5805	P	7	48	1	6
KIN21	542	254	5905	P	7	50	2	7	4
RIE16	620	426	4458	P	7	44	1	5
SAB04	625	502	3835	P	7	60	1	7
KIN01	562	270	3905	P	7	63
KIN06	577	285	5905	P	7	53
KIN08	533	245	5905	P	7	85
KIN11	590	251	5905	P	7	48
KIN15	599	227	5905	P	7	78
RIE02	617	306	5905	P	7	44
RIE11	517	314	4458	P	7	49
SAB04	625	508	3835	P	7	53
LYD09	653	562	3835	P	7	51
LYD12	625	605	3835	P	7	49
ECH01	620	647	1960	P	7	37
PEN04	514	795	2208	P	7	30
PEN14	522	770	2208	P	7	43
PEN15	615	710	1960	P	7	45
MAK12	20	855		P	7	96
MAK14	15	900		P	7	94
MAK16	35	877		P	7	134
PEN03	490	825	2208	P	7	32
BON07	532	151	5805	P	7	49
BON08	470	85	5805	P	7	80
KIN06	577	285	5960	P	6	48	1	3
KIN11	590	251	5965	P	6	72	1	8
KIN21	542	256	5965	P	6	105	2	3	12
RIE02	617	360	5965	P	6	87	1	3
RIE14	620	392	4525	P	6	102	1	3
LYD16	638	506	3900	P	6	87	1	5
KIN02	613	305	5965	P	6	66
KIN05	565	263	5965	P	6	53
KIN08	533	245	5965	P	6	54
RIE16	620	426	4525	P	6	64
SAB04	625	502	3900	P	6	56
LYD09	653	562	3900	P	6	75
LYD10	653	549	3900	P	6	85
LYD12	625	605	3900	P	6	48
ECH04	636	682	2015	P	6	68
PEN14	522	770	2267	P	6	94
PEN15	615	710	2015	P	6	81
MAK12	20	855		P	6	97
MAK14	15	900		P	6	63
MAK16	35	877		P	6	61
PEN03	490	825	2267	P	6	86
KLO01	342	880		P	6	29
KLO03	386	895	1623	P	6	99
KLO04	445	868	1623	P	6	104
KAL05	560	169	5860	P	6	26
KAL06	552	173	5860	P	6	46
BON08	470	85	5860	P	6	46
KAL04	555	141	6105	P	5	407	1	29
KAL05	557	170	6105	P	5	453	2	29	39
BON09	530	117	6105	P	5	510	1	126
KIN02	618	306	6125	P	5	334	2	40	9
KIN11	594	251	6125	P	5	316	1	34
KIN18	585	210	6125	P	5	411	1	202
RIE15	633	440	4670	P	5	229	1	3
LYD10	653	549	401	P	5	173	1	46
ECH09	610	728	2225	P	5	214	2	10	2
RIE02	617	306	6125	P	5	243
RIE10	630	384	4670	P	5	210
SAB30	658	530	4015	P	5	165
ECH04	636	682	2125	P	5	154
ECH07	650	632	2225	P	5	159
[EN14	522	770	2360	P	5	92
MAK18	32	888	13	P	5	34
PEN03	490	825	2360	P	5	103
KIN11	598	251	6268	P	4	31	1	2
KIN18	585	210	6268	P	4	106	1	7
LYD16	643	506	4110	P	4	54	1	10
PEN14	523	789	2418	P	4	25	1	11
BON09	535	106	6360	P	4	69
KIN02	621	307	6268	P	4	42
KIN13	600	276	6268	P	4	74
RIE01	627	351	6268	P	4	10
RIE02	617	306	6268	P	4	20
RIE10	633	384	4788	P	4	46
SAB02	663	505	410	P	4	37
SAB30	663	530	4110	P	4	32
LYD10	653	549	4110	P	4	41
ECH04	636	682	2215	P	4	48
ECH07	650	632	2215	P	4	20
PEN03	490	825	2418	P	4	20
BAD17	560	140	6360	P	4	44
KAL04	560	136	6360	P	4	44
KAL05	555	172	6360	P	4	42
BAD17	564	135	6650	P	3	526	2	41	9
KAL08	578	156	6650	P	3	557	2	48	9
BON11	530	100	6535	P	3	419	3	34	7	78
KIN04	620	305	6535	P	3	683	3	7	37	48
KIN13	605	278	6535	P	3	638	2	61	30
KIN17	605	208	6535	P	3	558	1	27
KIN20	645	246	6535	P	3	726	6	6	31	31	17	7	11
RIE01	633	351	6535	P	3	533	1	102
RIE10	640	386	5080	P	3	525	1	10
RIE15	636	432	5080	P	3	674	1	10
SAB02	670	502	4435	P	3	539	3	17	17	22
SAB28	667	524	4435	P	3	616	2	26	5
LYD10	658	549	4435	P	3	661	1	12
ECH02	655	646	2475	P	3	638	2	56	12
ECH07	660	625	2475	P	3	791	3	112	41	31
PEN03	498	830	2660	P	3	528	2	58	4
PEN14	528	789	2660	P	3	619	3	25	86	23
ECH09	625	733	2475	P	3	386
MAK12	30	857	375	P	3	723
MAK16	40	880	375	P	3	708
MAK18	35	890	375	P	3	540
KLO01	342	885	225	P	3	454
KLO03	386	895	1925	P	3	324
PIL01	690	627	2795	P	2	373	4	16	22	101	49
PIL02	697	612	2795	P	2	344	2	45	119
BAD07	550	105	6910	P	2	95	1	3
BAD11	569	124	6910	P	2	75	1	10
KIN04	634	310	6795	P	2	70	1	31
KIN07	642	300	6795	P	2	54	2	14	3
KIN01	645	320	6795	P	2	55	1	40
KIN16	644	232	6795	P	2	49	2	10	10
KIN20	650	242	6795	P	2	58	2	24	15
RIE08	646	385	5420	P	2	177	3	7	3	10
SAB03	655	475	5420	P	2	283	2	19	34
SAB03	658	480	5420	P	2	247	4	27	10	9	10
SAB27	712	540	4815	P	2	41	1	7
SAB29	673	532	4815	P	2	305	5	19	17	90	15	20
ECH02	655	646	2795	P	2	326	3	22	40	15
ECH08	680	660	2795	P	2	308	3	17	47	94
ECH10	640	743	2795	P	2	167	1	17
PEN02	501	831	2980	P	2	197	1	18
PEN08	490	837	2980	P	2	222	1	25
MAK21	50	897	785	P	2	351	1	104
BIR06	637	201	6795	P	2	78
KLO01	342	887	540	P	2	160
KLO03	386	895	2215	P	2	238
KLO01	342	895	980	P	1	699	4	36	40	21	92
KLO03	387	908	2655	P	1	1250	8	30	70	85	52	22	40	22	49
KLO14	435	900	2650	P	1	1025	8	6	70	61	9	4	41	38	34
PIL01	700	623	3130	P	1	681	3	34	22	52
BAD07	558	100	7155	P	1	542	6	27	5	10	5	14	10
BAD15	540	93	7155	P	1	483	2	9	10
KAL03	595	152	7155	P	1	502	5	34	27	7	2	17
BON10	535	90	7150	P	1	473	5	24	12	5	14	12
KIN10	650	315	7055	P	1	478	1	2
KIN16	648	232	7055	P	1	435	2	15	3
KIN20	656	241	7055	P	1	506	3	2	3	10
BIR06	637	201	7055	P	1	492	3	10	9	3
RIE07	675	363	7055	P	1	576	2	5	5
RIE18	666	395	5735	P	1	782	2	19	2
ECH03	650	717	3130	P	1	637	4	45	36	14	14
ECH10	650	750	3130	P	1	627	3	31	14	62
PEN02	507	834	3405	P	1	595	4	45	25	9	14
PEN08	495	805	3405	P	1	759	3	10	54	18
PEN11	532	800	3405	P	1	754	2	36	31
PEN12	587	762	3130	P	1	645	1	38
MAK10	63	885	1195	P	1	1731	5	38	31	142	212	13
MAK19	45	863	1195	P	1	1521	2	90	160
MAK21	57	900	1195	P	1	335	1	196
ECH08	685	665	3130	P	1	510
BAD11	572	120	7155	P	1	509
MAK19	52	860	1645	C	3	760	4	11	43	5	11
MAK15	191	890	1395	C	3	858
LAK16	391	930	3275	C	2	188	1	10
PEN01	511	834	3828	C	2	269	2	32	16
PEN05	530	810	3828	C	2	245	2	66	22
PEN06	588	805	3828	C	2	281	2	49	20
PEN07	548	797	3828	C	2	168	1	35
PEN09	508	842	3828	C	2	283	2	77	9
PEN22	522	823	3828	C	2	240	2	68	20
PEN12	586	770		C	2	40
PEN20	560	791		C	2	114
PEN21	560	783		C	2	83
MAK15	191	890	1700	C	2	151
LAK03	324	940	2715	C	1	614	2	9	5
LAK15	355	958	2715	C	1	1700	2	4	7
KLO02	250	895	2715	C	1	583	2	23	10
KLO06	231	890	2715	C	1	1550	2	3	6
KLO17	500	890	4385	C	1	1750	1	48
KLO21	425	935	4385	C	1	740	2	11	41
PLI03	710	655	3955	C	1	937	4	14	6	38	29
PIL08	725	700	3955	C	1	1017	5	6	7	6	29	69
PIL09	700	687	3955	C	1	681	3	6	29	69
BAD02	595	115	7500	C	1	179	2	20	26
BAD04	574	100	7500	C	1	166	4	4	34	10	7
BAD05	600	130	7500	C	1	195	1	58
BAD06	560	96	7500	C	1	230	4	7	7	10	7
BAD08	617	135	7500	C	1	146	1	31
BAD09	620	140	7500	C	1	135	1	36
BAD10	535	68	7500	C	1	164	1	29
BAD01	618	150	7500	C	1	117	1	24
BAD13	616	156	7500	C	1	97	1	5
BAD14	542	87	7500	C	1	177	2	39	6
KAL02	631	185	7475	C	1	308	3	12	7	34
KIN03	668	295	7475	C	1	344	1	24
KIN12	670	268	7475	C	1	279	1	39
RIE05	675	330	7475	C	1	421	2	7	10
RIE06	685	375	6185	C	1	371	3	9	7	3
SAB32	713	475	6185	C	1	519	3	14	39	16
RIE17	695	382	6185	C	1	331	1	5
OLI01	645	776	3955	C	1	1435	2	9	61
OLI09	611	775	3955	C	1	1500	1	70
ECH06	690	737	3955	C	1	1295	3	2	3	40
MAK09	75	888	2595	C	1	950	3	4	4	20
MAK11	78	870	2595	C	1	609	8	15	22	18	22	4	7	18	4
MAK15	195	880	2715	C	1	546	3	23	18	5
MAK05	25	919	2595	C	1	458	1	5
PEN18	565	805	4670	C	1	1400
LAK03	322	945	3590	B	1	160	1	4
BAD04	574	100	7614	B	1	31	2	9	4
BAD12	618	150	7614	B	1	19	1	6
KIN19	710	276	7660	B	1	31
SAB01	720	501	6145	B	1	19
SAB06	747	560	6145	B	1	32
SAB08	734	543	6145	B	1	26
SAB11	741	533	6145	B	1	29
SAB13	731	508	6145	B	1	22
SAB14	729	505	6145	B	1	27
SAB15	727	495	6145	B	1	27
SAB16	740	495	6145	B	1	14
SAB18	748	467	6394	B	1	10
SAB19	730	488	6394	B	1	25
SAB21	741	442	6394	B	1	10
SAB22	741	435	6394	B	1	12
OLI18	574	835	5575	B	1	230
OLI19	550	865	5575	B	1	257
OLI20	560	887	5575	B	1	800
MAK05	31	925	3410	B	1	301
MAK08	95	906	3410	B	1	65
MAK15	191	890	3590	B	1	187
MAK22	218	895	3590	B	1	151
KLO21	438	948	5453	B	1	423
PIL10	755	680	4570	B	1	121
LAK05	395	984	5453	B	1	236
BAD01	588	114	7614	B	1	20
BAD02	595	115		B	1	13
BAD05	600	130		B	1	14
BAD06	560	92		B	1	15
BAD08	620	130		B	1	21
BAD09	623	136		B	1	13
BAD13	616	156	7614	B	1	20
KAL02	631	185	7614	B	1	22
LAK08	316	955	3868	W	2	458	1	11
LAK09	255	917	3868	W	2	337	1	30
KLO12	506	932	6103	W	2	1009	1	25
MAK03	95	921	3663	W	2	287	1	64
MAK04	93	893	3663	W	2	327	1	23
MAK06	95	872	2663	W	2	455	1	20
MAK08	100	905	3663	W	2	340	1	29
MAK17	156	865	3868	W	2	374	1	22
MAK22	218	895	3868	W	2	342	1	18
MAK23			3663	W	2	267	1	34
SAB06	750	560	6230	W	2	128
SAB07	748	550	6230	W	2	93
SAB09	744	540	6230	W	2	56
SAB11	745	533	623	W	2	55
SAB12	741	522	6230	W	2	82
SAB13	731	508	6230	W	2	9
ECH01	620	647	2015	W	2	436
OLI03	640	790	4833	W	2	436
OLI04	723	770	4833	W	2	483
OLI05	720	775	4833	W	2	523
OLI07	655	785	4833	W	2	450
OLI11	709	785	4833	W	2	421
OLI15	718	744	4833	W	2	436
OLI16	610	816	5990	W	2	486
OLI17	614	814	5990	W	2	480
OLI18	578	840	5990	W	2	552
OLI19	555	868	5990	W	2	713
OLI20	560	887	5990	W	2	901
OLI21	560	857	5990	W	2	605
OLI22	587	830	5990	W	2	500
MAK02	93	925	3663	W	2	316
MAK15	191	890	3868	W	2	332
LAK01	328	957	3868	W	2	362
LAK02	375	981	6103	W	2	549
LAK03	322	945	3868	W	2	380
LAK04	288	934	3868	W	2	389
LAK18	472	955	6103	W	2	718
KLO05	540	905	6103	W	2	1273
PIL07	730	720	4833	W	2	383
LAK05	395	984	6103	W	2	389
SAB06	753	560	6325	W	1	58
SAB07	748	550	6325	W	1	64
SAB09	744	540	6325	W	1	77
OLI04	723	770	5150	W	1	242
OLI05	720	775	5150	W	1	224
OLI07	655	785	5150	W	1	236
OLI08	704	788	5150	W	1	323
OLI10	688	795	5150	W	1	276
OLI11	709	785	5150	W	1	226
OLI12	685	796	5150	W	1	348
OLI15	718	744	5150	W	1	295
OLI16	615	818	6373	W	1	206
OLI17	614	808	6373	W	1	203
OLI18	582	845	6373	W	1	284
OLI19	563	870	6373	W	1	590
OLI20	563	887	6373	W	1	787
OLI21	568	856	6373	W	1	612
OLI22	590	835	6373	W	1	214
OLI23	733	750	5150	W	1	486
MAK01				W	1	182
LAK01	324	966		W	1	106
LAK02	375	981	6725	W	1	137
LAK04	288	934	3868	W	1	35
LAK08	313	960		W	1	34
LAK14	461	980	6725	W	1	598
LAK18	474	965	6725	W	1	898
KLO07	503	955	6725	W	1	600
KLO08	522	931	6725	W	1	741
LAK05	395	984	6725	W	1	35
